# Supplementary material for: Weighted Gene Co-expression Network Analysis Identified a Novel Thirteen-Gene Signature Associated With Progression, Prognosis, and Immune Microenvironment of Colon Adenocarcinoma Patients
Source: PubMed Central journal article supplement (PMC8312261; doi:10.3389/fgene.2021.657658), 2021-07-12
Supplement: Table_1.pdf [file Table_1.pdf]

**Supplementary Table 1** The clinical information of COAD patients in TCGA-COAD dataset.

|                                    |     |
|------------------------------------|-----|
| <b>Number of patients</b>          | 521 |
| <b>Median Age (years)</b>          | 68  |
| <b>Histology Type</b>              |     |
| <b>Tumor</b>                       | 480 |
| <b>Normal</b>                      | 41  |
| <b>Gender</b>                      |     |
| <b>Male</b>                        | 243 |
| <b>Female</b>                      | 216 |
| <b>Pathological TNM Stage</b>      |     |
| <b>Stage I</b>                     | 76  |
| <b>Stage II</b>                    | 178 |
| <b>Stage III-IV</b>                | 194 |
| <b>NA</b>                          | 11  |
| <b>Pathological Tumor (T)</b>      |     |
| <b>T1</b>                          | 11  |
| <b>T2</b>                          | 78  |
| <b>T3</b>                          | 313 |
| <b>T4</b>                          | 57  |
| <b>Pathological Lymph Node (N)</b> |     |
| <b>N0</b>                          | 270 |
| <b>N1</b>                          | 106 |
| <b>N2</b>                          | 83  |
| <b>Pathological Metastasis (M)</b> |     |
| <b>M0</b>                          | 337 |
| <b>M1</b>                          | 65  |
| <b>NA</b>                          | 57  |
| <b>Overall event</b>               |     |
| <b>Death</b>                       | 92  |
| <b>Alive</b>                       | 367 |
