# Supplementary material for: Weighted Gene Co-expression Network Analysis Identified a Novel Thirteen-Gene Signature Associated With Progression, Prognosis, and Immune Microenvironment of Colon Adenocarcinoma Patients
Source: PubMed Central journal article supplement (PMC8312261; doi:10.3389/fgene.2021.657658), 2021-07-12
Supplement: Table_3.pdf [file Table_3.pdf]

**Supplementary Table 3** The clinical information of COAD patients in GSE17536 dataset.

|                                  |     |
|----------------------------------|-----|
| <b>Number of patients</b>        | 177 |
| <b>Median Age (years)</b>        | 66  |
| <b>Gender</b>                    |     |
| <b>Male</b>                      | 96  |
| <b>Female</b>                    | 81  |
| <b>Race</b>                      |     |
| <b>Caucasian</b>                 | 151 |
| <b>Black</b>                     | 9   |
| <b>Other</b>                     | 17  |
| <b>AJCC Stage</b>                |     |
| <b>Stage I</b>                   | 24  |
| <b>Stage II</b>                  | 57  |
| <b>Stage III-IV</b>              | 96  |
| <b>Grade</b>                     |     |
| <b>Poorly differentiated</b>     | 27  |
| <b>Moderately differentiated</b> | 134 |
| <b>Well differentiated</b>       | 16  |
| <b>Recurrence</b>                |     |
| <b>Recurrence</b>                | 35  |
| <b>No recurrence</b>             | 109 |
| <b>NA</b>                        | 32  |
| <b>Overall event</b>             |     |
| <b>Death</b>                     | 73  |
| <b>Alive</b>                     | 104 |
