# Supplementary material for: Weighted Gene Co-expression Network Analysis Identified a Novel Thirteen-Gene Signature Associated With Progression, Prognosis, and Immune Microenvironment of Colon Adenocarcinoma Patients
Source: PubMed Central journal article supplement (PMC8312261; doi:10.3389/fgene.2021.657658), 2021-07-12
Supplement: Table_4.pdf [file Table_4.pdf]

**Supplementary table 4** KEGG enrichment analysis of the thirteen prognostic genes derived from the predictive signature in COAD.

| <b>ID</b>       | <b>Description</b>                        | <b>Count</b> | <b>p-value</b> | <b>q-value</b> | <b>Gene ID</b> |
|-----------------|-------------------------------------------|--------------|----------------|----------------|----------------|
| <b>hsa00983</b> | Drug metabolism - other enzymes           | 2            | 0.002          | 0.014          | NAT1/NAT2      |
| <b>hsa05204</b> | Chemical carcinogenesis                   | 2            | 0.002          | 0.014          | NAT1/NAT2      |
| <b>hsa00020</b> | Citrate cycle (TCA cycle)                 | 1            | 0.026          | 0.087          | SUCLG2         |
| <b>hsa00640</b> | Propanoate metabolism                     | 1            | 0.029          | 0.087          | SUCLG2         |
| <b>hsa04960</b> | Aldosterone-regulated sodium reabsorption | 1            | 0.032          | 0.087          | NR3C2          |
