# Supplementary material for: Weighted Gene Co-expression Network Analysis Identified a Novel Thirteen-Gene Signature Associated With Progression, Prognosis, and Immune Microenvironment of Colon Adenocarcinoma Patients
Source: PubMed Central journal article supplement (PMC8312261; doi:10.3389/fgene.2021.657658), 2021-07-12
Supplement: Table_5.pdf [file Table_5.pdf]

**Supplementary table 5** GO enrichment analysis of the thirteen prognostic genes derived from the predictive signature in COAD.

| <b>ONTOLOGY</b> | <b>ID</b>  | <b>Description</b>                                      | <b>Count</b> | <b>p-value</b> | <b>q-value</b> | <b>Gene ID</b>           |
|-----------------|------------|---------------------------------------------------------|--------------|----------------|----------------|--------------------------|
| <b>BP</b>       | GO:071466  | cellular response to xenobiotic stimulus                | 4            | 0.000          | 0.004          | EPHX2/NAT1/NAT2/PPARGC1A |
| <b>BP</b>       | GO:009410  | response to xenobiotic stimulus                         | 4            | 0.000          | 0.013          | EPHX2/NAT1/NAT2/PPARGC1A |
| <b>BP</b>       | GO:006805  | xenobiotic metabolic process                            | 3            | 0.000          | 0.015          | EPHX2/NAT1/NAT2          |
| <b>BP</b>       | GO:0042759 | long-chain fatty acid biosynthetic process              | 2            | 0.000          | 0.024          | EPHX2/HPGD               |
| <b>BP</b>       | GO:0072330 | monocarboxylic acid biosynthetic process                | 3            | 0.002          | 0.068          | EPHX2/HPGD/PPARGC1A      |
| <b>BP</b>       | GO:0048661 | positive regulation of smooth muscle cell proliferation | 2            | 0.003          | 0.068          | HPGD/PPARGC1A            |
| <b>BP</b>       | GO:006631  | fatty acid metabolic process                            | 3            | 0.003          | 0.068          | EPHX2/HPGD/PPARGC1A      |
| <b>BP</b>       | GO:0001676 | long-chain fatty acid metabolic process                 | 2            | 0.003          | 0.068          | EPHX2/HPGD               |
| <b>BP</b>       | GO:0033559 | unsaturated fatty acid metabolic process                | 2            | 0.003          | 0.068          | EPHX2/HPGD               |
| <b>BP</b>       | GO:006690  | icosanoid metabolic process                             | 2            | 0.004          | 0.068          | EPHX2/HPGD               |
| <b>BP</b>       | GO:0019218 | regulation of steroid metabolic process                 | 2            | 0.004          | 0.068          | EPHX2/PPARGC1A           |
| <b>BP</b>       | GO:0032355 | response to estradiol                                   | 2            | 0.005          | 0.068          | HPGD/PPARGC1A            |
| <b>BP</b>       | GO:0007586 | digestion                                               | 2            | 0.005          | 0.068          | PLS1/PPARGC1A            |

|           |                    |                                                        |   |       |       |                     |
|-----------|--------------------|--------------------------------------------------------|---|-------|-------|---------------------|
| <b>BP</b> | GO:0<br>0463<br>94 | carboxylic acid biosynthetic<br>process                | 3 | 0.005 | 0.068 | EPHX2/HPGD/PPARGC1A |
| <b>BP</b> | GO:0<br>0160<br>53 | organic acid biosynthetic process                      | 3 | 0.006 | 0.068 | EPHX2/HPGD/PPARGC1A |
| <b>BP</b> | GO:0<br>0352<br>96 | regulation of tube diameter                            | 2 | 0.006 | 0.068 | EPHX2/CHGA          |
| <b>BP</b> | GO:0<br>0508<br>80 | regulation of blood vessel size                        | 2 | 0.006 | 0.068 | EPHX2/CHGA          |
| <b>BP</b> | GO:0<br>0977<br>46 | regulation of blood vessel<br>diameter                 | 2 | 0.006 | 0.068 | EPHX2/CHGA          |
| <b>BP</b> | GO:0<br>0351<br>50 | regulation of tube size                                | 2 | 0.006 | 0.068 | EPHX2/CHGA          |
| <b>BP</b> | GO:0<br>0066<br>33 | fatty acid biosynthetic process                        | 2 | 0.007 | 0.068 | EPHX2/HPGD          |
| <b>BP</b> | GO:1<br>9015<br>68 | fatty acid derivative metabolic<br>process             | 2 | 0.008 | 0.068 | EPHX2/HPGD          |
| <b>BP</b> | GO:0<br>0486<br>60 | regulation of smooth muscle cell<br>proliferation      | 2 | 0.008 | 0.068 | HPGD/PPARGC1A       |
| <b>BP</b> | GO:0<br>0358<br>65 | cellular response to potassium<br>ion                  | 1 | 0.008 | 0.068 | PPARGC1A            |
| <b>BP</b> | GO:0<br>0713<br>13 | cellular response to caffeine                          | 1 | 0.008 | 0.068 | PPARGC1A            |
| <b>BP</b> | GO:0<br>0486<br>59 | smooth muscle cell proliferation                       | 2 | 0.008 | 0.068 | HPGD/PPARGC1A       |
| <b>BP</b> | GO:0<br>0030<br>18 | vascular process in circulatory<br>system              | 2 | 0.008 | 0.068 | EPHX2/CHGA          |
| <b>BP</b> | GO:0<br>0508<br>21 | protein stabilization                                  | 2 | 0.009 | 0.068 | TSPAN1/PPARGC1A     |
| <b>BP</b> | GO:0<br>0468       | positive regulation of hormone<br>biosynthetic process | 1 | 0.009 | 0.068 | PPARGC1A            |

---

|           |                    |                                                                                                       |   |       |       |                 |
|-----------|--------------------|-------------------------------------------------------------------------------------------------------|---|-------|-------|-----------------|
|           | 86                 |                                                                                                       |   |       |       |                 |
| <b>BP</b> | GO:0<br>0713<br>72 | cellular response to<br>follicle-stimulating hormone<br>stimulus                                      | 1 | 0.009 | 0.068 | PPARGC1A        |
| <b>BP</b> | GO:0<br>0860<br>23 | adenylate cyclase-activating<br>adrenergic receptor signaling<br>pathway involved in heart<br>process | 1 | 0.009 | 0.068 | CHGA            |
| <b>BP</b> | GO:1<br>9010<br>77 | regulation of relaxation of<br>muscle                                                                 | 1 | 0.009 | 0.068 | CHGA            |
| <b>BP</b> | GO:0<br>0082<br>17 | regulation of blood pressure                                                                          | 2 | 0.009 | 0.068 | EPHX2/CHGA      |
| <b>BP</b> | GO:0<br>0434<br>01 | steroid hormone mediated<br>signaling pathway                                                         | 2 | 0.009 | 0.068 | NR3C2/PPARGC1A  |
| <b>BP</b> | GO:0<br>0025<br>51 | mast cell chemotaxis                                                                                  | 1 | 0.010 | 0.068 | CHGA            |
| <b>BP</b> | GO:0<br>0148<br>89 | muscle atrophy                                                                                        | 1 | 0.010 | 0.068 | PPARGC1A        |
| <b>BP</b> | GO:0<br>0454<br>72 | response to ether                                                                                     | 1 | 0.010 | 0.068 | PPARGC1A        |
| <b>BP</b> | GO:0<br>0704<br>93 | thrombin-activated receptor<br>signaling pathway                                                      | 1 | 0.010 | 0.068 | HPGD            |
| <b>BP</b> | GO:0<br>0975<br>31 | mast cell migration                                                                                   | 1 | 0.010 | 0.068 | CHGA            |
| <b>BP</b> | GO:0<br>0063<br>67 | transcription initiation from RNA<br>polymerase II promoter                                           | 2 | 0.010 | 0.068 | NR3C2/PPARGC1A  |
| <b>BP</b> | GO:0<br>0453<br>33 | cellular respiration                                                                                  | 2 | 0.010 | 0.068 | SUCLG2/PPARGC1A |
| <b>BP</b> | GO:0<br>0060<br>12 | galactose metabolic process                                                                           | 1 | 0.010 | 0.068 | PPARGC1A        |
| <b>BP</b> | GO:0<br>0325<br>30 | regulation of microvillus<br>organization                                                             | 1 | 0.010 | 0.068 | PLS1            |

---

|           |      |                                                                  |   |       |       |               |
|-----------|------|------------------------------------------------------------------|---|-------|-------|---------------|
|           | GO:0 |                                                                  |   |       |       |               |
| <b>BP</b> | 0325 | regulation of cell projection size                               | 1 | 0.010 | 0.068 | PLS1          |
|           | 36   |                                                                  |   |       |       |               |
|           | GO:0 |                                                                  |   |       |       |               |
| <b>BP</b> | 0432 | response to leucine                                              | 1 | 0.010 | 0.068 | PPARGC1A      |
|           | 01   |                                                                  |   |       |       |               |
|           | GO:0 |                                                                  |   |       |       |               |
| <b>BP</b> | 0458 | negative regulation of glycolytic process                        | 1 | 0.010 | 0.068 | PPARGC1A      |
|           | 20   |                                                                  |   |       |       |               |
|           | GO:0 |                                                                  |   |       |       |               |
| <b>BP</b> | 0714 | cellular response to purine-containing compound                  | 1 | 0.010 | 0.068 | PPARGC1A      |
|           | 15   |                                                                  |   |       |       |               |
|           | GO:0 |                                                                  |   |       |       |               |
| <b>BP</b> | 0604 | positive regulation of cardiac muscle contraction                | 1 | 0.011 | 0.068 | CHGA          |
|           | 52   |                                                                  |   |       |       |               |
|           | GO:1 |                                                                  |   |       |       |               |
| <b>BP</b> | 9012 | negative regulation of neuron death                              | 2 | 0.012 | 0.068 | CHGA/PPARGC1A |
|           | 15   |                                                                  |   |       |       |               |
|           | GO:0 |                                                                  |   |       |       |               |
| <b>BP</b> | 0098 | flavonoid metabolic process                                      | 1 | 0.012 | 0.068 | PPARGC1A      |
|           | 12   |                                                                  |   |       |       |               |
|           | GO:0 |                                                                  |   |       |       |               |
| <b>BP</b> | 0148 | response to stimulus involved in regulation of muscle adaptation | 1 | 0.012 | 0.068 | PPARGC1A      |
|           | 74   |                                                                  |   |       |       |               |
|           | GO:0 |                                                                  |   |       |       |               |
| <b>BP</b> | 0308 | negative regulation of nucleotide catabolic process              | 1 | 0.012 | 0.068 | PPARGC1A      |
|           | 12   |                                                                  |   |       |       |               |
|           | GO:0 |                                                                  |   |       |       |               |
| <b>BP</b> | 0323 | positive regulation of hormone metabolic process                 | 1 | 0.012 | 0.068 | PPARGC1A      |
|           | 52   |                                                                  |   |       |       |               |
|           | GO:0 |                                                                  |   |       |       |               |
| <b>BP</b> | 0336 | negative regulation of catecholamine secretion                   | 1 | 0.012 | 0.068 | CHGA          |
|           | 04   |                                                                  |   |       |       |               |
|           | GO:0 |                                                                  |   |       |       |               |
| <b>BP</b> | 0358 | response to potassium ion                                        | 1 | 0.012 | 0.068 | PPARGC1A      |
|           | 64   |                                                                  |   |       |       |               |
|           | GO:0 |                                                                  |   |       |       |               |
| <b>BP</b> | 0463 | positive regulation of fatty acid oxidation                      | 1 | 0.012 | 0.068 | PPARGC1A      |
|           | 21   |                                                                  |   |       |       |               |
|           | GO:0 |                                                                  |   |       |       |               |
| <b>BP</b> | 0511 | negative regulation of coenzyme metabolic process                | 1 | 0.012 | 0.068 | PPARGC1A      |
|           | 98   |                                                                  |   |       |       |               |
|           | GO:0 |                                                                  |   |       |       |               |
| <b>BP</b> | 0075 | parturition                                                      | 1 | 0.013 | 0.068 | HPGD          |

---

|           |          |                                                                        |   |       |       |          |
|-----------|----------|------------------------------------------------------------------------|---|-------|-------|----------|
|           | 67       |                                                                        |   |       |       |          |
| <b>BP</b> | GO:0105  | regulation of ketone biosynthetic process                              | 1 | 0.013 | 0.068 | PPARGC1A |
|           | 66       |                                                                        |   |       |       |          |
| <b>BP</b> | GO:0193  | lipoxygenase pathway                                                   | 1 | 0.013 | 0.068 | HPGD     |
|           | 72       |                                                                        |   |       |       |          |
| <b>BP</b> | GO:0323  | response to follicle-stimulating hormone                               | 1 | 0.013 | 0.068 | PPARGC1A |
|           | 54       |                                                                        |   |       |       |          |
| <b>BP</b> | GO:0424  | progesterone metabolic process                                         | 1 | 0.013 | 0.068 | PPARGC1A |
|           | 48       |                                                                        |   |       |       |          |
| <b>BP</b> | GO:0457  | positive regulation of gluconeogenesis                                 | 1 | 0.013 | 0.068 | PPARGC1A |
|           | 22       |                                                                        |   |       |       |          |
| <b>BP</b> | GO:0459  | positive regulation of striated muscle contraction                     | 1 | 0.013 | 0.068 | CHGA     |
|           | 89       |                                                                        |   |       |       |          |
| <b>BP</b> | GO:0551  | relaxation of cardiac muscle                                           | 1 | 0.013 | 0.068 | CHGA     |
|           | 19       |                                                                        |   |       |       |          |
| <b>BP</b> | GO:0718  | response to epinephrine                                                | 1 | 0.013 | 0.068 | PPARGC1A |
|           | 71       |                                                                        |   |       |       |          |
| <b>BP</b> | GO:0861  | G protein-coupled receptor signaling pathway involved in heart process | 1 | 0.013 | 0.068 | CHGA     |
|           | 03       |                                                                        |   |       |       |          |
| <b>BP</b> | GO:0970  | cellular response to thyroid hormone stimulus                          | 1 | 0.013 | 0.068 | PPARGC1A |
|           | 67       |                                                                        |   |       |       |          |
| <b>BP</b> | GO:20011 | negative regulation of ATP biosynthetic process                        | 1 | 0.013 | 0.068 | PPARGC1A |
|           | 70       |                                                                        |   |       |       |          |
| <b>BP</b> | GO:0189  | ether metabolic process                                                | 1 | 0.014 | 0.070 | EPHX2    |
|           | 04       |                                                                        |   |       |       |          |
| <b>BP</b> | GO:0310  | response to caffeine                                                   | 1 | 0.014 | 0.070 | PPARGC1A |
|           | 00       |                                                                        |   |       |       |          |
| <b>BP</b> | GO:0362  | response to diuretic                                                   | 1 | 0.014 | 0.070 | PPARGC1A |
|           | 70       |                                                                        |   |       |       |          |
| <b>BP</b> | GO:0     | negative regulation of nucleotide                                      | 1 | 0.014 | 0.071 | PPARGC1A |

---

---

|           |      |                                                               |   |       |       |                |
|-----------|------|---------------------------------------------------------------|---|-------|-------|----------------|
|           | 0308 | biosynthetic process                                          |   |       |       |                |
|           | 09   |                                                               |   |       |       |                |
|           | GO:0 |                                                               |   |       |       |                |
| <b>BP</b> | 0713 | cellular response to gonadotropin stimulus                    | 1 | 0.014 | 0.071 | PPARGC1A       |
|           | 71   |                                                               |   |       |       |                |
|           | GO:1 |                                                               |   |       |       |                |
| <b>BP</b> | 9003 | negative regulation of purine nucleotide biosynthetic process | 1 | 0.014 | 0.071 | PPARGC1A       |
|           | 72   |                                                               |   |       |       |                |
|           | GO:0 |                                                               |   |       |       |                |
| <b>BP</b> | 0097 | hormone-mediated signaling pathway                            | 2 | 0.015 | 0.071 | NR3C2/PPARGC1A |
|           | 55   |                                                               |   |       |       |                |
|           | GO:1 |                                                               |   |       |       |                |
| <b>BP</b> | 9021 | cellular response to reactive nitrogen species                | 1 | 0.015 | 0.071 | PPARGC1A       |
|           | 70   |                                                               |   |       |       |                |
|           | GO:0 |                                                               |   |       |       |                |
| <b>BP</b> | 0302 | lipid modification                                            | 2 | 0.015 | 0.071 | EPHX2/PPARGC1A |
|           | 58   |                                                               |   |       |       |                |
|           | GO:0 |                                                               |   |       |       |                |
| <b>BP</b> | 0330 | muscle cell proliferation                                     | 2 | 0.015 | 0.071 | HPGD/PPARGC1A  |
|           | 02   |                                                               |   |       |       |                |
|           | GO:0 |                                                               |   |       |       |                |
| <b>BP</b> | 0193 | epoxygenase P450 pathway                                      | 1 | 0.016 | 0.071 | EPHX2          |
|           | 73   |                                                               |   |       |       |                |
|           | GO:0 |                                                               |   |       |       |                |
| <b>BP</b> | 0320 | mitochondrial DNA metabolic process                           | 1 | 0.016 | 0.071 | PPARGC1A       |
|           | 42   |                                                               |   |       |       |                |
|           | GO:0 |                                                               |   |       |       |                |
| <b>BP</b> | 0063 | DNA-templated transcription, initiation                       | 2 | 0.017 | 0.071 | NR3C2/PPARGC1A |
|           | 52   |                                                               |   |       |       |                |
|           | GO:0 |                                                               |   |       |       |                |
| <b>BP</b> | 0715 | cellular response to transforming growth factor beta stimulus | 2 | 0.017 | 0.071 | HPGD/PPARGC1A  |
|           | 60   |                                                               |   |       |       |                |
|           | GO:0 |                                                               |   |       |       |                |
| <b>BP</b> | 0713 | cellular response to steroid hormone stimulus                 | 2 | 0.017 | 0.071 | NR3C2/PPARGC1A |
|           | 83   |                                                               |   |       |       |                |
|           | GO:0 |                                                               |   |       |       |                |
| <b>BP</b> | 0108 | positive regulation of steroid biosynthetic process           | 1 | 0.017 | 0.071 | PPARGC1A       |
|           | 93   |                                                               |   |       |       |                |
|           | GO:0 |                                                               |   |       |       |                |
| <b>BP</b> | 0307 | ovulation                                                     | 1 | 0.017 | 0.071 | HPGD           |
|           | 28   |                                                               |   |       |       |                |
|           | GO:0 |                                                               |   |       |       |                |
| <b>BP</b> | 0080 | regulation of heart contraction                               | 2 | 0.017 | 0.071 | FXYD3/CHGA     |
|           | 16   |                                                               |   |       |       |                |

---

|           |                    |                                                      |   |       |       |                 |
|-----------|--------------------|------------------------------------------------------|---|-------|-------|-----------------|
| <b>BP</b> | GO:0<br>0715<br>59 | response to transforming growth factor beta          | 2 | 0.017 | 0.073 | HPGD/PPARGC1A   |
| <b>BP</b> | GO:0<br>0511<br>95 | negative regulation of cofactor metabolic process    | 1 | 0.018 | 0.073 | PPARGC1A        |
| <b>BP</b> | GO:0<br>0902<br>57 | regulation of muscle system process                  | 2 | 0.018 | 0.073 | CHGA/PPARGC1A   |
| <b>BP</b> | GO:0<br>0324<br>12 | regulation of ion transmembrane transporter activity | 2 | 0.018 | 0.073 | FXYD3/PPARGC1A  |
| <b>BP</b> | GO:0<br>0901<br>40 | regulation of mitochondrial fission                  | 1 | 0.018 | 0.073 | PPARGC1A        |
| <b>BP</b> | GO:0<br>0228<br>98 | regulation of transmembrane transporter activity     | 2 | 0.019 | 0.074 | FXYD3/PPARGC1A  |
| <b>BP</b> | GO:0<br>0148<br>50 | response to muscle activity                          | 1 | 0.019 | 0.074 | PPARGC1A        |
| <b>BP</b> | GO:0<br>0325<br>28 | microvillus organization                             | 1 | 0.019 | 0.074 | PLS1            |
| <b>BP</b> | GO:0<br>0600<br>47 | heart contraction                                    | 2 | 0.021 | 0.074 | FXYD3/CHGA      |
| <b>BP</b> | GO:0<br>0067<br>00 | C21-steroid hormone biosynthetic process             | 1 | 0.021 | 0.074 | PPARGC1A        |
| <b>BP</b> | GO:0<br>0970<br>66 | response to thyroid hormone                          | 1 | 0.021 | 0.074 | PPARGC1A        |
| <b>BP</b> | GO:1<br>9035<br>79 | negative regulation of ATP metabolic process         | 1 | 0.021 | 0.074 | PPARGC1A        |
| <b>BP</b> | GO:0<br>0324<br>09 | regulation of transporter activity                   | 2 | 0.021 | 0.074 | FXYD3/PPARGC1A  |
| <b>BP</b> | GO:0<br>0316<br>47 | regulation of protein stability                      | 2 | 0.021 | 0.074 | TSPAN1/PPARGC1A |
| <b>BP</b> | GO:0<br>0159       | energy derivation by oxidation of organic compounds  | 2 | 0.021 | 0.074 | SUCLG2/PPARGC1A |

|           |      |                                                            |   |       |       |            |
|-----------|------|------------------------------------------------------------|---|-------|-------|------------|
|           | 80   |                                                            |   |       |       |            |
|           | GO:0 |                                                            |   |       |       |            |
| <b>BP</b> | 0020 | response to dietary excess                                 | 1 | 0.021 | 0.074 | PPARGC1A   |
|           | 21   |                                                            |   |       |       |            |
|           | GO:0 |                                                            |   |       |       |            |
| <b>BP</b> | 0020 | regulation of the force of heart contraction               | 1 | 0.021 | 0.074 | CHGA       |
|           | 26   |                                                            |   |       |       |            |
|           | GO:0 |                                                            |   |       |       |            |
| <b>BP</b> | 0468 | regulation of hormone biosynthetic process                 | 1 | 0.021 | 0.074 | PPARGC1A   |
|           | 85   |                                                            |   |       |       |            |
|           | GO:0 |                                                            |   |       |       |            |
| <b>BP</b> | 0519 | negative regulation of amine transport                     | 1 | 0.021 | 0.074 | CHGA       |
|           | 53   |                                                            |   |       |       |            |
|           | GO:0 |                                                            |   |       |       |            |
| <b>BP</b> | 0030 | heart process                                              | 2 | 0.022 | 0.074 | FXYP3/CHGA |
|           | 15   |                                                            |   |       |       |            |
|           | GO:0 |                                                            |   |       |       |            |
| <b>BP</b> | 0082 | androgen metabolic process                                 | 1 | 0.022 | 0.074 | PPARGC1A   |
|           | 09   |                                                            |   |       |       |            |
|           | GO:0 |                                                            |   |       |       |            |
| <b>BP</b> | 0346 | response to gonadotropin                                   | 1 | 0.022 | 0.074 | PPARGC1A   |
|           | 98   |                                                            |   |       |       |            |
|           | GO:0 |                                                            |   |       |       |            |
| <b>BP</b> | 0435 | skeletal muscle adaptation                                 | 1 | 0.022 | 0.074 | PPARGC1A   |
|           | 01   |                                                            |   |       |       |            |
|           | GO:1 |                                                            |   |       |       |            |
| <b>BP</b> | 9005 | negative regulation of purine nucleotide metabolic process | 1 | 0.022 | 0.074 | PPARGC1A   |
|           | 43   |                                                            |   |       |       |            |
|           | GO:0 |                                                            |   |       |       |            |
| <b>BP</b> | 0459 | negative regulation of nucleotide metabolic process        | 1 | 0.023 | 0.074 | PPARGC1A   |
|           | 80   |                                                            |   |       |       |            |
|           | GO:1 |                                                            |   |       |       |            |
| <b>BP</b> | 9035 | regulation of blood circulation                            | 2 | 0.023 | 0.074 | FXYP3/CHGA |
|           | 22   |                                                            |   |       |       |            |
|           | GO:0 |                                                            |   |       |       |            |
| <b>BP</b> | 0000 | mitochondrial genome maintenance                           | 1 | 0.024 | 0.074 | PPARGC1A   |
|           | 02   |                                                            |   |       |       |            |
|           | GO:0 |                                                            |   |       |       |            |
| <b>BP</b> | 0350 | positive regulation of histone acetylation                 | 1 | 0.024 | 0.074 | PPARGC1A   |
|           | 66   |                                                            |   |       |       |            |
|           | GO:0 |                                                            |   |       |       |            |
| <b>BP</b> | 0459 | positive regulation of steroid metabolic process           | 1 | 0.024 | 0.074 | PPARGC1A   |
|           | 40   |                                                            |   |       |       |            |
| <b>BP</b> | GO:0 | regulation of fatty acid oxidation                         | 1 | 0.024 | 0.074 | PPARGC1A   |



---

|           |      |                                                                     |   |       |       |               |
|-----------|------|---------------------------------------------------------------------|---|-------|-------|---------------|
|           | 0463 |                                                                     |   |       |       |               |
|           | 20   |                                                                     |   |       |       |               |
|           | GO:0 |                                                                     |   |       |       |               |
| <b>BP</b> | 0610 | myeloid leukocyte cytokine production                               | 1 | 0.024 | 0.074 | CHGA          |
|           | 82   |                                                                     |   |       |       |               |
|           | GO:0 |                                                                     |   |       |       |               |
| <b>BP</b> | 0400 | positive regulation of multicellular organism growth                | 1 | 0.025 | 0.074 | PLS1          |
|           | 18   |                                                                     |   |       |       |               |
|           | GO:0 |                                                                     |   |       |       |               |
| <b>BP</b> | 0434 | regulation of cellular respiration                                  | 1 | 0.025 | 0.074 | PPARGC1A      |
|           | 57   |                                                                     |   |       |       |               |
|           | GO:0 |                                                                     |   |       |       |               |
| <b>BP</b> | 0718 | adenylate cyclase-activating adrenergic receptor signaling pathway  | 1 | 0.025 | 0.074 | CHGA          |
|           | 80   |                                                                     |   |       |       |               |
|           | GO:0 |                                                                     |   |       |       |               |
| <b>BP</b> | 0900 | relaxation of muscle                                                | 1 | 0.025 | 0.074 | CHGA          |
|           | 75   |                                                                     |   |       |       |               |
|           | GO:0 |                                                                     |   |       |       |               |
| <b>BP</b> | 0457 | positive regulation of G protein-coupled receptor signaling pathway | 1 | 0.025 | 0.075 | CHGA          |
|           | 45   |                                                                     |   |       |       |               |
|           | GO:1 |                                                                     |   |       |       |               |
| <b>BP</b> | 9012 | regulation of neuron death                                          | 2 | 0.025 | 0.075 | CHGA/PPARGC1A |
|           | 14   |                                                                     |   |       |       |               |
|           | GO:2 |                                                                     |   |       |       |               |
| <b>BP</b> | 0007 | positive regulation of peptidyl-lysine acetylation                  | 1 | 0.026 | 0.075 | PPARGC1A      |
|           | 58   |                                                                     |   |       |       |               |
|           | GO:0 |                                                                     |   |       |       |               |
| <b>BP</b> | 0060 | tricarboxylic acid cycle                                            | 1 | 0.027 | 0.075 | SUCLG2        |
|           | 99   |                                                                     |   |       |       |               |
|           | GO:0 |                                                                     |   |       |       |               |
| <b>BP</b> | 0718 | adrenergic receptor signaling pathway                               | 1 | 0.027 | 0.075 | CHGA          |
|           | 75   |                                                                     |   |       |       |               |
|           | GO:0 |                                                                     |   |       |       |               |
| <b>BP</b> | 0970 | energy homeostasis                                                  | 1 | 0.027 | 0.075 | PPARGC1A      |
|           | 09   |                                                                     |   |       |       |               |
|           | GO:0 |                                                                     |   |       |       |               |
| <b>BP</b> | 0002 | mitochondrial fission                                               | 1 | 0.028 | 0.075 | PPARGC1A      |
|           | 66   |                                                                     |   |       |       |               |
|           | GO:0 |                                                                     |   |       |       |               |
| <b>BP</b> | 0061 | citrate metabolic process                                           | 1 | 0.028 | 0.075 | SUCLG2        |
|           | 01   |                                                                     |   |       |       |               |
|           | GO:0 |                                                                     |   |       |       |               |
| <b>BP</b> | 0713 | cellular response to alkaloid                                       | 1 | 0.028 | 0.075 | PPARGC1A      |
|           | 12   |                                                                     |   |       |       |               |

---

|           |      |                                                          |   |       |       |                |
|-----------|------|----------------------------------------------------------|---|-------|-------|----------------|
|           | GO:0 |                                                          |   |       |       |                |
| <b>BP</b> | 0324 | response to lipopolysaccharide                           | 2 | 0.028 | 0.075 | HPGD/PPARGC1A  |
|           | 96   |                                                          |   |       |       |                |
|           | GO:0 |                                                          |   |       |       |                |
| <b>BP</b> | 0082 | steroid metabolic process                                | 2 | 0.028 | 0.075 | EPHX2/PPARGC1A |
|           | 02   |                                                          |   |       |       |                |
|           | GO:0 |                                                          |   |       |       |                |
| <b>BP</b> | 0713 | cellular response to estradiol stimulus                  | 1 | 0.029 | 0.075 | PPARGC1A       |
|           | 92   |                                                          |   |       |       |                |
|           | GO:2 |                                                          |   |       |       |                |
| <b>BP</b> | 0003 | regulation of NMDA receptor activity                     | 1 | 0.029 | 0.075 | PPARGC1A       |
|           | 10   |                                                          |   |       |       |                |
|           | GO:2 |                                                          |   |       |       |                |
| <b>BP</b> | 0011 | positive regulation of ATP biosynthetic process          | 1 | 0.029 | 0.075 | PPARGC1A       |
|           | 71   |                                                          |   |       |       |                |
|           | GO:0 |                                                          |   |       |       |                |
| <b>BP</b> | 0149 | negative regulation of smooth muscle cell migration      | 1 | 0.029 | 0.075 | PPARGC1A       |
|           | 12   |                                                          |   |       |       |                |
|           | GO:0 |                                                          |   |       |       |                |
| <b>BP</b> | 0459 | positive regulation of fatty acid metabolic process      | 1 | 0.029 | 0.075 | PPARGC1A       |
|           | 23   |                                                          |   |       |       |                |
|           | GO:0 |                                                          |   |       |       |                |
| <b>BP</b> | 0468 | phospholipid dephosphorylation                           | 1 | 0.029 | 0.075 | EPHX2          |
|           | 39   |                                                          |   |       |       |                |
|           | GO:1 |                                                          |   |       |       |                |
| <b>BP</b> | 9040 | regulation of cation transmembrane transport             | 2 | 0.030 | 0.075 | FXYD3/PPARGC1A |
|           | 62   |                                                          |   |       |       |                |
|           | GO:0 |                                                          |   |       |       |                |
| <b>BP</b> | 0323 | regulation of hormone metabolic process                  | 1 | 0.030 | 0.075 | PPARGC1A       |
|           | 50   |                                                          |   |       |       |                |
|           | GO:0 |                                                          |   |       |       |                |
| <b>BP</b> | 0466 | negative regulation of insulin secretion                 | 1 | 0.030 | 0.075 | CHGA           |
|           | 76   |                                                          |   |       |       |                |
|           | GO:0 |                                                          |   |       |       |                |
| <b>BP</b> | 0508 | intestinal absorption                                    | 1 | 0.030 | 0.075 | PLS1           |
|           | 92   |                                                          |   |       |       |                |
|           | GO:0 |                                                          |   |       |       |                |
| <b>BP</b> | 0718 | response to monoamine                                    | 1 | 0.030 | 0.075 | PPARGC1A       |
|           | 67   |                                                          |   |       |       |                |
|           | GO:0 |                                                          |   |       |       |                |
| <b>BP</b> | 0718 | response to catecholamine                                | 1 | 0.030 | 0.075 | PPARGC1A       |
|           | 69   |                                                          |   |       |       |                |
|           | GO:1 |                                                          |   |       |       |                |
| <b>BP</b> | 9040 | positive regulation of epithelial cell apoptotic process | 1 | 0.030 | 0.075 | PPARGC1A       |

|           |            |                                                                |   |       |       |               |
|-----------|------------|----------------------------------------------------------------|---|-------|-------|---------------|
|           | 37         |                                                                |   |       |       |               |
| <b>BP</b> | GO:002237  | response to molecule of bacterial origin                       | 2 | 0.030 | 0.075 | HPGD/PPARGC1A |
| <b>BP</b> | GO:008207  | C21-steroid hormone metabolic process                          | 1 | 0.031 | 0.076 | PPARGC1A      |
| <b>BP</b> | GO:007235  | tricarboxylic acid metabolic process                           | 1 | 0.031 | 0.076 | SUCLG2        |
| <b>BP</b> | GO:007099  | neuron death                                                   | 2 | 0.031 | 0.076 | CHGA/PPARGC1A |
| <b>BP</b> | GO:0045823 | positive regulation of heart contraction                       | 1 | 0.032 | 0.076 | CHGA          |
| <b>BP</b> | GO:0050832 | defense response to fungus                                     | 1 | 0.032 | 0.076 | CHGA          |
| <b>BP</b> | GO:0050873 | brown fat cell differentiation                                 | 1 | 0.032 | 0.077 | PPARGC1A      |
| <b>BP</b> | GO:0010677 | negative regulation of cellular carbohydrate metabolic process | 1 | 0.033 | 0.077 | PPARGC1A      |
| <b>BP</b> | GO:0010907 | positive regulation of glucose metabolic process               | 1 | 0.033 | 0.077 | PPARGC1A      |
| <b>BP</b> | GO:0042181 | ketone biosynthetic process                                    | 1 | 0.033 | 0.077 | PPARGC1A      |
| <b>BP</b> | GO:0006692 | prostanoid metabolic process                                   | 1 | 0.034 | 0.077 | HPGD          |
| <b>BP</b> | GO:0006693 | prostaglandin metabolic process                                | 1 | 0.034 | 0.077 | HPGD          |
| <b>BP</b> | GO:0003086 | cortical actin cytoskeleton organization                       | 1 | 0.034 | 0.077 | PLS1          |
| <b>BP</b> | GO:0005160 | response to electrical stimulus                                | 1 | 0.034 | 0.077 | PPARGC1A      |
| <b>BP</b> | GO:000202  | adipose tissue development                                     | 1 | 0.034 | 0.077 | PPARGC1A      |

---

|           |      |                                                               |   |       |       |                |
|-----------|------|---------------------------------------------------------------|---|-------|-------|----------------|
|           | 0606 |                                                               |   |       |       |                |
|           | 12   |                                                               |   |       |       |                |
|           | GO:1 |                                                               |   |       |       |                |
| <b>BP</b> | 9019 | positive regulation of protein acetylation                    | 1 | 0.034 | 0.077 | PPARGC1A       |
|           | 85   |                                                               |   |       |       |                |
|           | GO:0 |                                                               |   |       |       |                |
| <b>BP</b> | 0902 | negative regulation of peptide hormone secretion              | 1 | 0.036 | 0.080 | CHGA           |
|           | 78   |                                                               |   |       |       |                |
|           | GO:0 |                                                               |   |       |       |                |
| <b>BP</b> | 0308 | positive regulation of nucleotide biosynthetic process        | 1 | 0.036 | 0.080 | PPARGC1A       |
|           | 10   |                                                               |   |       |       |                |
|           | GO:0 |                                                               |   |       |       |                |
| <b>BP</b> | 0713 | cellular response to interleukin-6                            | 1 | 0.036 | 0.080 | PPARGC1A       |
|           | 54   |                                                               |   |       |       |                |
|           | GO:1 |                                                               |   |       |       |                |
| <b>BP</b> | 9003 | positive regulation of purine nucleotide biosynthetic process | 1 | 0.036 | 0.080 | PPARGC1A       |
|           | 73   |                                                               |   |       |       |                |
|           | GO:0 |                                                               |   |       |       |                |
| <b>BP</b> | 0433 | mast cell degranulation                                       | 1 | 0.037 | 0.080 | CHGA           |
|           | 03   |                                                               |   |       |       |                |
|           | GO:1 |                                                               |   |       |       |                |
| <b>BP</b> | 9035 | positive regulation of ATP metabolic process                  | 1 | 0.037 | 0.080 | PPARGC1A       |
|           | 80   |                                                               |   |       |       |                |
|           | GO:0 |                                                               |   |       |       |                |
| <b>BP</b> | 0485 | response to steroid hormone                                   | 2 | 0.037 | 0.080 | NR3C2/PPARGC1A |
|           | 45   |                                                               |   |       |       |                |
|           | GO:0 |                                                               |   |       |       |                |
| <b>BP</b> | 0022 | mast cell activation involved in immune response              | 1 | 0.038 | 0.080 | CHGA           |
|           | 79   |                                                               |   |       |       |                |
|           | GO:0 |                                                               |   |       |       |                |
| <b>BP</b> | 0061 | regulation of gluconeogenesis                                 | 1 | 0.038 | 0.080 | PPARGC1A       |
|           | 11   |                                                               |   |       |       |                |
|           | GO:0 |                                                               |   |       |       |                |
| <b>BP</b> | 0308 | cortical cytoskeleton organization                            | 1 | 0.038 | 0.080 | PLS1           |
|           | 65   |                                                               |   |       |       |                |
|           | GO:0 |                                                               |   |       |       |                |
| <b>BP</b> | 0459 | negative regulation of carbohydrate metabolic process         | 1 | 0.038 | 0.080 | PPARGC1A       |
|           | 12   |                                                               |   |       |       |                |
|           | GO:0 |                                                               |   |       |       |                |
| <b>BP</b> | 0459 | positive regulation of muscle contraction                     | 1 | 0.038 | 0.080 | CHGA           |
|           | 33   |                                                               |   |       |       |                |
|           | GO:0 |                                                               |   |       |       |                |
| <b>BP</b> | 0024 | mast cell mediated immunity                                   | 1 | 0.039 | 0.080 | CHGA           |
|           | 48   |                                                               |   |       |       |                |

---

|           |                    |                                                                  |   |       |       |                 |
|-----------|--------------------|------------------------------------------------------------------|---|-------|-------|-----------------|
| <b>BP</b> | GO:1<br>9047<br>07 | positive regulation of vascular smooth muscle cell proliferation | 1 | 0.039 | 0.080 | HPGD            |
| <b>BP</b> | GO:0<br>0029<br>31 | response to ischemia                                             | 1 | 0.039 | 0.081 | PPARGC1A        |
| <b>BP</b> | GO:0<br>0094<br>09 | response to cold                                                 | 1 | 0.039 | 0.081 | PPARGC1A        |
| <b>BP</b> | GO:0<br>0707<br>41 | response to interleukin-6                                        | 1 | 0.039 | 0.081 | PPARGC1A        |
| <b>BP</b> | GO:0<br>0193<br>69 | arachidonic acid metabolic process                               | 1 | 0.040 | 0.082 | EPHX2           |
| <b>BP</b> | GO:0<br>0067<br>32 | coenzyme metabolic process                                       | 2 | 0.041 | 0.082 | SUCLG2/PPARGC1A |
| <b>BP</b> | GO:0<br>0096<br>20 | response to fungus                                               | 1 | 0.041 | 0.082 | CHGA            |
| <b>BP</b> | GO:2<br>0006<br>49 | regulation of sodium ion transmembrane transporter activity      | 1 | 0.041 | 0.082 | FXYD3           |
| <b>BP</b> | GO:0<br>0350<br>65 | regulation of histone acetylation                                | 1 | 0.042 | 0.083 | PPARGC1A        |
| <b>BP</b> | GO:0<br>0192<br>16 | regulation of lipid metabolic process                            | 2 | 0.042 | 0.083 | EPHX2/PPARGC1A  |
| <b>BP</b> | GO:0<br>0066<br>36 | unsaturated fatty acid biosynthetic process                      | 1 | 0.043 | 0.084 | HPGD            |
| <b>BP</b> | GO:0<br>0108<br>23 | negative regulation of mitochondrion organization                | 1 | 0.043 | 0.084 | PPARGC1A        |
| <b>BP</b> | GO:0<br>0464<br>56 | icosanoid biosynthetic process                                   | 1 | 0.043 | 0.084 | HPGD            |
| <b>BP</b> | GO:1<br>9030<br>78 | positive regulation of protein localization to plasma membrane   | 1 | 0.044 | 0.085 | PLS1            |
| <b>BP</b> | GO:0<br>0148       | striated muscle adaptation                                       | 1 | 0.045 | 0.085 | PPARGC1A        |

|           |                    |                                                                   |   |       |       |          |
|-----------|--------------------|-------------------------------------------------------------------|---|-------|-------|----------|
|           | 88                 |                                                                   |   |       |       |          |
| <b>BP</b> | GO:0<br>0459<br>81 | positive regulation of nucleotide<br>metabolic process            | 1 | 0.045 | 0.085 | PPARGC1A |
| <b>BP</b> | GO:0<br>0713<br>98 | cellular response to fatty acid                                   | 1 | 0.045 | 0.085 | PPARGC1A |
| <b>BP</b> | GO:1<br>9005<br>44 | positive regulation of purine<br>nucleotide metabolic process     | 1 | 0.045 | 0.085 | PPARGC1A |
| <b>BP</b> | GO:2<br>0002<br>72 | negative regulation of signaling<br>receptor activity             | 1 | 0.045 | 0.085 | PPARGC1A |
| <b>BP</b> | GO:0<br>0977<br>55 | positive regulation of blood<br>vessel diameter                   | 1 | 0.046 | 0.087 | EPHX2    |
| <b>BP</b> | GO:2<br>0007<br>56 | regulation of peptidyl-lysine<br>acetylation                      | 1 | 0.046 | 0.087 | PPARGC1A |
| <b>BP</b> | GO:0<br>0455<br>76 | mast cell activation                                              | 1 | 0.047 | 0.087 | CHGA     |
| <b>BP</b> | GO:0<br>0305<br>21 | androgen receptor signaling<br>pathway                            | 1 | 0.048 | 0.087 | PPARGC1A |
| <b>BP</b> | GO:0<br>0106<br>76 | positive regulation of cellular<br>carbohydrate metabolic process | 1 | 0.049 | 0.087 | PPARGC1A |
| <b>BP</b> | GO:0<br>0316<br>40 | killing of cells of other organism                                | 1 | 0.049 | 0.087 | CHGA     |
| <b>BP</b> | GO:0<br>0329<br>22 | circadian regulation of gene<br>expression                        | 1 | 0.049 | 0.087 | PPARGC1A |
| <b>BP</b> | GO:0<br>0443<br>64 | disruption of cells of other<br>organism                          | 1 | 0.049 | 0.087 | CHGA     |
| <b>BP</b> | GO:0<br>0504<br>33 | regulation of catecholamine<br>secretion                          | 1 | 0.049 | 0.087 | CHGA     |
| <b>BP</b> | GO:1<br>9023<br>05 | regulation of sodium ion<br>transmembrane transport               | 1 | 0.049 | 0.087 | FXYP3    |
| <b>BP</b> | GO:0               | regulation of cholesterol                                         | 1 | 0.049 | 0.088 | EPHX2    |

|           |      |                                                               |   |       |       |           |
|-----------|------|---------------------------------------------------------------|---|-------|-------|-----------|
|           | 0901 | metabolic process                                             |   |       |       |           |
|           | 81   |                                                               |   |       |       |           |
|           | GO:1 |                                                               |   |       |       |           |
| <b>BP</b> | 9043 | positive regulation of protein localization to cell periphery | 1 | 0.049 | 0.088 | PLS1      |
|           | 77   |                                                               |   |       |       |           |
|           | GO:0 |                                                               |   |       |       |           |
| <b>CC</b> | 0425 | zymogen granule membrane                                      | 1 | 0.009 | 0.119 | ZG16      |
|           | 89   |                                                               |   |       |       |           |
|           | GO:0 |                                                               |   |       |       |           |
| <b>CC</b> | 0425 | zymogen granule                                               | 1 | 0.012 | 0.119 | ZG16      |
|           | 88   |                                                               |   |       |       |           |
|           | GO:0 |                                                               |   |       |       |           |
| <b>CC</b> | 0452 | tricarboxylic acid cycle enzyme complex                       | 1 | 0.012 | 0.119 | SUCLG2    |
|           | 39   |                                                               |   |       |       |           |
|           | GO:0 |                                                               |   |       |       |           |
| <b>CC</b> | 0974 | apical dendrite                                               | 1 | 0.015 | 0.119 | PPARGC1A  |
|           | 40   |                                                               |   |       |       |           |
|           | GO:0 |                                                               |   |       |       |           |
| <b>CC</b> | 0426 | mast cell granule                                             | 1 | 0.019 | 0.123 | CHGA      |
|           | 29   |                                                               |   |       |       |           |
|           | GO:0 |                                                               |   |       |       |           |
| <b>CC</b> | 0057 | nuclear euchromatin                                           | 1 | 0.026 | 0.139 | PPARGC1A  |
|           | 19   |                                                               |   |       |       |           |
|           | GO:0 |                                                               |   |       |       |           |
| <b>CC</b> | 0007 | euchromatin                                                   | 1 | 0.032 | 0.150 | PPARGC1A  |
|           | 91   |                                                               |   |       |       |           |
|           | GO:0 |                                                               |   |       |       |           |
| <b>CC</b> | 0057 | peroxisomal matrix                                            | 1 | 0.043 | 0.156 | EPHX2     |
|           | 82   |                                                               |   |       |       |           |
|           | GO:0 |                                                               |   |       |       |           |
| <b>CC</b> | 0319 | microbody lumen                                               | 1 | 0.043 | 0.156 | EPHX2     |
|           | 07   |                                                               |   |       |       |           |
|           | GO:0 |                                                               |   |       |       |           |
| <b>MF</b> | 0080 | N-acetyltransferase activity                                  | 2 | 0.003 | 0.046 | NAT1/NAT2 |
|           | 80   |                                                               |   |       |       |           |
|           | GO:0 |                                                               |   |       |       |           |
| <b>MF</b> | 0164 | acetyltransferase activity                                    | 2 | 0.004 | 0.046 | NAT1/NAT2 |
|           | 07   |                                                               |   |       |       |           |
|           | GO:0 |                                                               |   |       |       |           |
| <b>MF</b> | 0164 | N-acyltransferase activity                                    | 2 | 0.004 | 0.046 | NAT1/NAT2 |
|           | 10   |                                                               |   |       |       |           |
|           | GO:0 |                                                               |   |       |       |           |
| <b>MF</b> | 0049 | prostaglandin receptor activity                               | 1 | 0.008 | 0.046 | HPGD      |
|           | 55   |                                                               |   |       |       |           |

|           |        |                                                                             |   |       |       |              |
|-----------|--------|-----------------------------------------------------------------------------|---|-------|-------|--------------|
|           | GO:0   |                                                                             |   |       |       |              |
| <b>MF</b> | 016803 | ether hydrolase activity                                                    | 1 | 0.008 | 0.046 | EPHX2        |
|           | GO:0   |                                                                             |   |       |       |              |
| <b>MF</b> | 004954 | prostanoid receptor activity                                                | 1 | 0.009 | 0.046 | HPGD         |
|           | GO:0   |                                                                             |   |       |       |              |
| <b>MF</b> | 015643 | toxic substance binding                                                     | 1 | 0.009 | 0.046 | EPHX2        |
|           | GO:0   |                                                                             |   |       |       |              |
| <b>MF</b> | 016801 | hydrolase activity, acting on ether bonds                                   | 1 | 0.009 | 0.046 | EPHX2        |
|           | GO:0   |                                                                             |   |       |       |              |
| <b>MF</b> | 042577 | lipid phosphatase activity                                                  | 1 | 0.009 | 0.046 | EPHX2        |
|           | GO:0   |                                                                             |   |       |       |              |
| <b>MF</b> | 042975 | peroxisome proliferator activated receptor binding                          | 1 | 0.010 | 0.046 | PPARGC1A     |
|           | GO:0   |                                                                             |   |       |       |              |
| <b>MF</b> | 070403 | NAD+ binding                                                                | 1 | 0.012 | 0.048 | HPGD         |
|           | GO:0   |                                                                             |   |       |       |              |
| <b>MF</b> | 004953 | icosanoid receptor activity                                                 | 1 | 0.013 | 0.048 | HPGD         |
|           | GO:0   |                                                                             |   |       |       |              |
| <b>MF</b> | 000287 | magnesium ion binding                                                       | 2 | 0.014 | 0.048 | SUCLG2/EPHX2 |
|           | GO:0   |                                                                             |   |       |       |              |
| <b>MF</b> | 016747 | transferase activity, transferring acyl groups other than amino-acyl groups | 2 | 0.016 | 0.051 | NAT1/NAT2    |
|           | GO:0   |                                                                             |   |       |       |              |
| <b>MF</b> | 016922 | nuclear receptor binding                                                    | 1 | 0.017 | 0.051 | PPARGC1A     |
|           | GO:0   |                                                                             |   |       |       |              |
| <b>MF</b> | 072509 | divalent inorganic cation transmembrane transporter activity                | 1 | 0.020 | 0.055 | SLC41A2      |
|           | GO:0   |                                                                             |   |       |       |              |
| <b>MF</b> | 016746 | transferase activity, transferring acyl groups                              | 2 | 0.020 | 0.055 | NAT1/NAT2    |
|           | GO:0   |                                                                             |   |       |       |              |
| <b>MF</b> | 016878 | acid-thiol ligase activity                                                  | 1 | 0.025 | 0.063 | SUCLG2       |
|           | GO:0   |                                                                             |   |       |       |              |
| <b>MF</b> | 0011   | RNA polymerase II repressing transcription factor binding                   | 1 | 0.029 | 0.067 | MIER3        |



---

|           |      |                                              |   |       |       |          |
|-----------|------|----------------------------------------------|---|-------|-------|----------|
|           | 03   |                                              |   |       |       |          |
|           | GO:0 |                                              |   |       |       |          |
| <b>MF</b> | 0170 | sodium channel regulator activity            | 1 | 0.030 | 0.067 | FXYD3    |
|           | 80   |                                              |   |       |       |          |
|           | GO:0 |                                              |   |       |       |          |
| <b>MF</b> | 0430 | alpha-tubulin binding                        | 1 | 0.031 | 0.067 | PPARGC1A |
|           | 14   |                                              |   |       |       |          |
|           | GO:0 |                                              |   |       |       |          |
| <b>MF</b> | 0168 | ligase activity, forming carbon-sulfur bonds | 1 | 0.033 | 0.069 | SUCLG2   |
|           | 77   |                                              |   |       |       |          |
|           | GO:0 |                                              |   |       |       |          |
| <b>MF</b> | 0303 | estrogen receptor binding                    | 1 | 0.035 | 0.069 | PPARGC1A |
|           | 31   |                                              |   |       |       |          |
|           | GO:0 |                                              |   |       |       |          |
| <b>MF</b> | 0506 | androgen receptor binding                    | 1 | 0.037 | 0.069 | PPARGC1A |
|           | 81   |                                              |   |       |       |          |
|           | GO:1 |                                              |   |       |       |          |
| <b>MF</b> | 9908 | promoter-specific chromatin binding          | 1 | 0.040 | 0.072 | PPARGC1A |
|           | 41   |                                              |   |       |       |          |
|           | GO:0 |                                              |   |       |       |          |
| <b>MF</b> | 0037 | steroid hormone receptor activity            | 1 | 0.046 | 0.078 | NR3C2    |
|           | 07   |                                              |   |       |       |          |
|           | GO:0 |                                              |   |       |       |          |
| <b>MF</b> | 0512 | NAD binding                                  | 1 | 0.046 | 0.078 | HPGD     |
|           | 87   |                                              |   |       |       |          |

---
